# Supplementary material for: Enhanced Pathogen Detection in Hematology Patients with Respiratory Infections Using Targeted Next-Generation Sequencing (tNGS)
Source: Research Square preprint supplement (doi:10.21203/rs.3.rs-6951707/v1), 2025-06-25
Supplement: Supplementary file 1 [file 0e9470890c8f68abfc3da188.docx]

Table legend

Table S1 198 common respiratory pathogens

Table S2 Distribution of pathogens in study cohort and detection rate heterogeneity between tNGS and TMT.
