# Supplementary material for: Enhanced Pathogen Detection in Hematology Patients with Respiratory Infections Using Targeted Next-Generation Sequencing (tNGS)
Source: Research Square preprint supplement (doi:10.21203/rs.3.rs-6951707/v1), 2025-06-25
Supplement: Supplementary file 2 [file 2b43d563896fbe1f90d6dbf5.xlsx]

## Sheet: Sheet1
Table S2
pathogen	TNGS (%)	TMT (%)
Epstein-barr virus (EBV)	47.2973	0
Aspergillus flavus	29.7297	2.7027
SARS-CoV-2	27.027	8.10811
Herpes simplex virus type 1	25.6757	0
Haemophilus influenzae	20.2703	2.7027
Candida albicans	20.2703	4.05405
Rhinovirus type A	16.2162	5.40541
Respiratory syncytial virus B	16.2162	10.8108
Pneumocystis jirovecii	14.8649	0
Influenza B virus	12.1622	2.7027
Streptococcus anginosus group	9.45946	0
Klebsiella pneumoniae	8.10811	4.05405
Stenotrophomonas maltophilia	6.75676	5.40541
Rhinoviruses type C	6.75676	0
Candida glabrata	6.75676	2.7027
Smoke aspergillus	5.40541	2.7027
Influenza A virus	5.40541	2.7027
Human respiratory virus type 3	5.40541	0
Cytomegalovirus (CMV)	5.40541	0
Aspergillus Niger	5.40541	0
The tiny micro cell bacteria	4.05405	0
Streptococcus pneumoniae	4.05405	0
Pseudomonas aeruginosa	4.05405	0
Human herpesvirus 7 (HHV-7)	4.05405	0
Human coronavirus	4.05405	0
Candida tropicalis	4.05405	0
Candida parapsilosis	4.05405	0
Adenovirus type	4.05405	4.05405
Staphylococcus aureus	2.7027	0
Soil aspergillus	2.7027	0
Rhizobium microsporum	2.7027	0
Respiratory syncytial virus type A	2.7027	0
Human herpesvirus 6B (HHV-6B)	2.7027	0
Human adenovirus type 2	2.7027	0
Az library Delhi wei pichia soft candida (g)	2.7027	0
Acinetobacter baumannii	2.7027	0
Transverse Terrier branching	1.35135	0
Rhizopus oryzae	1.35135	0
Rhinoviruses type B	1.35135	0
Partial pulmonary virus	1.35135	0
Mycoplasma pneumoniae	1.35135	0
Human mumps virus type 4 (human parainfluenza virus type 4)	1.35135	0
E. coli	1.35135	2.7027
Burkholderia cepacia	1.35135	0
Saccharomyces cerevisiae	0	1.35135
Candida Portugal	0	1.35135
