# Supplementary material for: Enhanced Pathogen Detection in Hematology Patients with Respiratory Infections Using Targeted Next-Generation Sequencing (tNGS)
Source: Research Square preprint supplement (doi:10.21203/rs.3.rs-6951707/v1), 2025-06-25
Supplement: Supplementary file 4 [file 71b950bc3fa723a2a0578598.xlsx]

## Sheet: Sheet1
Submission time	name	Gender	Age	Neutrophils	platelet	Specimen type	tNGS result	TMT result
2024-02-21 11:58:48	Zhang Bing	male	39 years old	0	1	sputum	EBV: 9657:>1.0e+6, HSV-1: 3956:9.3e+4, HHV-7: 12:<1.0e+3,	negative
2024-01-20 11:14:54	Wu Qinying	female	86 years old	3.75	1	sputum	Influenza A virus: 22631:>1.0e+6, Aspergillus flavus complex: 3108:1.3e+4, Staphylococcus aureus: 2345:2.9e+3, Aspergillus niger complex: 121:1.8e+3,	Influenza A virus, Aspergillus flavus, Aspergillus fumigatus
2024-04-20 11:38:44	Wangxiuying	female	60 years old	0.02	1	sputum	Epstein Barr virus (EBV): 47543:>1.0e+6, human herpesvirus 7 (HHV-7): 14:<1.0e+3,	negative
2024-03-11 17:01:29	Yuansiyuan	female	19 years old	0.01	2	sputum	Novel coronavirus: 42033:>1.0e+6, herpes simplex virus type 1 (HSV-1): 17:<1.0e+3, human respiratory syncytial virus type B: 12:<1.0e+3,	Novel coronavirus
2024-04-04 11:17:03	Zhang Yuxin	male	75 years old	0.01	3	sputum	Candida albicans: 24918:>1.0e+6, Aspergillus flavus complex: 16549:>1.0e+6, herpes simplex virus type 1 (HSV-1): 115:2.1e+4, Pseudomonas aeruginosa: 27:<1.0e+3,	negative
2024-02-24 12:21:48	Wanghaoqin	male	61 years old	11.19	3	sputum	Micromonomonas: 252:<1.0e+3, Fusobacterium nucleatum: 40:<1.0e+3,	negative
2024-02-06 11:22:01	Gaoguomei	female	72 years old	0.15	4	sputum	Herpes simplex virus type 1 (HSV-1): 441:3.0e+4, Streptococcus angina group: 318:3.6e+3, Fusobacterium nucleatum: 109:8.1e+3, EB virus (EBV): 30:<1.0e+3,	negative
2024-01-10 11:03:58	Chengguohui	male	69 years old	0.01	4	sputum	Herpes simplex virus type 1 (HSV-1): 30874:>1.0e+6, Aspergillus flavus complex group: 3530:5.0e+3,	negative
2024-03-13 11:46:37	Hanbingqiang	male	60 years old	0.27	5	sputum	Novel coronavirus: 28313:>1.0e+6, human respiratory syncytial virus type B: 27148:>1.0e+6, Aspergillus fumigatus: 7356:1.0e+4, Candida albicans: 3137:3.6e+3, herpes simplex virus type 1 (HSV-1): 1028:6.8e+4,	Candida albicans, Stenotrophomonas maltophilia
2024-02-26 12:02:43	Slow Mongolian speed	female	42 years old	0.01	6	sputum	Rhinovirus type A: 46870:>1.0e+6, herpes simplex virus type 1 (HSV-1): 14592:>1.0e+6, influenza B virus: 177:2.9e+4, EB virus (EBV): 79:<1.0e+3,	Human rhinovirus
2024-04-24 15:25:41	Mei Xueying	female	75 years old	0.29	7	sputum	Rhinovirus type A: 33627:>1.0e+6, Aspergillus flavus complex: 3334:2.1e+4, Streptococcus pneumoniae: 379:3.2e+3,	negative
2024-03-18 11:14:26	Lidianbiao	male	65 years old	0.03	7	sputum	Novel coronavirus: 1492:9.4e+3, EB virus (EBV): 872:1.5e+4, Candida albicans: 368:<1.0e+3, Rhizopus Microspora: 103:<1.0e+3, human herpesvirus 7 (HHV-7): 12:<1.0e+3,	negative
2024-02-21 11:44:12	Yuansiyuan	female	19 years old	0.02	8	sputum	Novel coronavirus: 29193:>1.0e+6, Mycoplasma pneumoniae: 20574:>1.0e+6, human respiratory syncytial virus type B: 10963:>1.0e+6, Candida tropicalis: 4093:1.5e+4, macrolide antibiotics: 23S rrna:a2063g:100%	Novel coronavirus
2024-03-29 11:54:29	Li Yilian	male	85 years old	0.02	10	sputum	Human respiratory syncytial virus type B: 40311:>1.0e+6, human adenovirus type 6: 16710:>1.0e+6, EB virus (EBV): 1191:5.5e+4, Aspergillus flavus complex group: 73:<1.0e+3,	Respiratory syncytial virus
2024-01-06 11:28:01	Chenwenliang	male	76 years old	0.36	10	sputum	EBV: 24281:>1.0e+6, influenza A virus: 1807:2.9e+4, Candida parapsilosis: 688:<1.0e+3, cytomegalovirus (CMV): 88:2.5e+3,	negative
2024-02-06 11:22:01	Liang Jixian	male	77 years old	0.03	11	sputum	Human respiratory syncytial virus type B: 15570:>1.0e+6, Candida tropicalis: 619:<1.0e+3, Candida parapsilosis: 483:<1.0e+3,	Respiratory syncytial virus
2024-01-29 11:54:33	Yu Huiying	female	55 years old	0.3	13	sputum	Influenza B virus: 52144:>1.0e+6, Candida albicans: 16140:>1.0e+6, EB virus (EBV): 606:5.0e+4,	negative
2024-01-16 11:54:55	Wangjunying	female	52 years old	0.03	13	sputum	Human coronavirus 229e:34624:>1.0e+6, Pneumocystis jirovecii 11211:>1.0e+6, herpes simplex virus type 1 (HSV-1): 10351:>1.0e+6, EB virus (EBV): 492:1.0e+4, T. branched: 358:<1.0e+3,	Influenza A virus,
2024-03-20 11:44:36	Wangchuanyou	male	57 years old	0.03	13	sputum	Novel coronavirus (omicron_xbb.1): 22546:>1.0e+6,	Novel coronavirus
2024-03-13 15:37:35	Jiangdechun	male	61 years old	0.05	14	sputum	Streptococcus pneumoniae: 56034:>1.0e+6, Candida albicans: 12232:>1.0e+6, Fusobacterium nucleatum: 56:<1.0e+3,	negative
2024-03-01 11:49:05	Xingshikui	male	75 years old	0.29	15	sputum	Rhinovirus A: 20568:>1.0e+6, Pseudomonas aeruginosa: 20088:>1.0e+6, EB virus (EBV): 9716:>1.0e+6, human coronavirus 229e:7834:6.6e+5, influenza A virus: 4471:2.3e+5, human herpesvirus 6B (HHV-6B): 1257:9.0e+4,	negative
2024-01-12 11:20:15	Panende	male	61 years old	2.25	22	sputum	Human respiratory syncytial virus type B: 17629:>1.0e+6, Candida glabrata: 4733:5.3e+3, EB virus (EBV): 3066:1.2e+5, Pneumocystis yarrowii: 70:<1.0e+3,	Candida glabrata, Stenotrophomonas maltophilia
2024-02-21 11:54:14	Lidianbiao	male	65 years old	3.3	26	sputum	Novel coronavirus: 73744:>1.0e+6, Candida albicans: 2972:1.1e+4, Epstein Barr virus (EBV): 647:1.7e+5,	negative
2024-04-02 11:32:33	Zhangzhenrong	female	66 years old	0	31	sputum	Novel coronavirus: 76520:>1.0e+6, EB virus (EBV): 4852:>1.0e+6,	negative
2024-01-26 11:10:29	Panende	male	61 years old	4.39	32	sputum	Candida glabrata: 24651:>1.0e+6, Stenotrophomonas maltophilia: 22470:>1.0e+6, EB virus (EBV): 4843:1.1e+5, Aspergillus flavus complex: 219:2.2e+3, Pneumocystis yarrowii: 26:<1.0e+3,	Candida glabrata, Stenotrophomonas maltophilia
2024-02-27 12:01:22	Panende	male	61 years old	4.39	32	sputum	Haemophilus influenzae: 48965:>1.0e+6, rhinovirus type A: 18498:>1.0e+6, Acinetobacter baumannii: 826:4.1e+4, Epstein Barr virus (EBV): 76:<1.0e+3, Pneumocystis jirovecii: 32:<1.0e+3,	Haemophilus influenzae
2024-01-25 11:32:37	Fujunmei	female	57 years old	0	38	sputum	Influenza B virus: 46881:>1.0e+6, Aspergillus flavus complex: 10102:>1.0e+6, Klebsiella pneumoniae: 1978:2.7e+4, human respiratory syncytial virus type B: 305:7.9e+4,	negative
2024-02-19 12:24:10	Luoguichun	male	52 years old	0.48	44	sputum	Haemophilus influenzae: 53529:>1.0e+6, Fusobacterium nucleatum: 5227:2.0e+5, EB virus (EBV): 1368:2.3e+5, herpes simplex virus type 1 (HSV-1): 254:4.0e+4, Streptococcus angina group: 236:5.1e+3,	Respiratory syncytial virus
2024-03-04 11:06:44	Xuxinguo	male	48 years old	0.72	56	sputum	Novel coronavirus: 31332:>1.0e+6, EB virus (EBV): 8898:>1.0e+6,	Novel coronavirus
2024-02-03 11:52:03	Wangdazhao	male	75 years old	1.43	56	sputum	Influenza B virus: 36397:>1.0e+6, Aspergillus fumigatus: 10486:>1.0e+6, Aspergillus flavus complex group: 4283:2.5e+4, Aspergillus terreus complex group: 598:5.5e+3, Fusobacterium nucleatum: 112:5.4e+3, EB virus (EBV): 47:<1.0e+3,	negative
2024-01-30 11:52:54	Guoxiang	male	34 years old	3.12	56	sputum	Influenza B virus: 29545:>1.0e+6, EB virus (EBV): 9675:>1.0e+6, Fusobacterium nucleatum: 280:7.0e+3,	negative
2024-03-23 12:46:36	Mei Xueying	female	75 years old	0.12	57	sputum	Human respiratory virus type 3 (human parainfluenza virus type 3): 45749:>1.0e+6, rhinovirus type C: 17661:>1.0e+6, novel coronavirus: 6911:3.0e+5, Epstein Barr virus (EBV): 141:1.9e+4, Pneumocystis yarrowii: 97:<1.0e+3, Aspergillus flavus complex group: 60:<1.0e+3,	Aspergillus fumigatus
2024-03-23 12:39:12	Fujunmei	female	57 years old	1.1	62	sputum	Novel coronavirus: 66375:>1.0e+6, rhinovirus type C: 8585:>1.0e+6, Klebsiella pneumoniae: 2186:2.0e+5, Aspergillus flavus complex: 502:7.6e+4, herpes simplex virus type 1 (HSV-1): 264:1.7e+5, Stenotrophomonas maltophilia: 129:4.6e+4,	klebsiella pneumoniae
2024-01-24 12:00:01	Fujunmei	female	57 years old	1.1	62	sputum	Influenza B virus: 68798:>1.0e+6, Klebsiella pneumoniae: 2277:2.0e+4, human respiratory syncytial virus type B: 1895:1.9e+5, Pneumocystis yarrowii: 84:<1.0e+3,	negative
2024-03-18 11:28:52	Lilongmei	female	74 years old	0.32	70	sputum	Candida albicans: 41050:>1.0e+6, EB virus (EBV): 8289:>1.0e+6, Aspergillus flavus complex group: 6719:3.3e+4, Haemophilus influenzae: 404:1.0e+4, Aspergillus fumigatus: 222:<1.0e+3, Fusobacterium nucleatum: 180:5.3e+3, Aspergillus niger complex group: 82:1.4e+3, Streptococcus angina group: 37:< 1.0e+3, Pneumocystis yarrowii: 35:<1.0e+3,	Influenza B virus,
2024-02-12 13:02:07	Lifengying	female	78 years old	0.94	83	sputum	Human respiratory virus type 3 (human parainfluenza virus type 3): 36918:>1.0e+6, human respiratory syncytial virus type B: 19377:>1.0e+6, rhinovirus type A: 13895:>1.0e+6,	Respiratory syncytial virus
2024-03-08 11:11:34	Wangchuanyou	male	56 years old	1.54	85	sputum	Novel coronavirus (omicron_xbb.1): 51384:>1.0e+6, cytomegalovirus (CMV): 26:<1.0e+3,	Novel coronavirus
2024-02-28 15:44:15	Lanyonghe	male	66 years old	0.75	96	sputum	Escherichia coli: 6585:1.0e+5, Haemophilus influenzae: 2231:5.8e+4, EB virus (EBV): 1783:7.8e+4, herpes simplex virus type 1 (HSV-1): 1047:3.8e+4, Fusobacterium nucleatum: 325:1.0e+4, human adenovirus type 2: 230:5.2e+3, Streptococcus angina group: 172:1.5e+3,	Escherichia coli
2024-03-13 15:34:01	Guoxiang	male	34 years old	5.2	100	sputum	Novel coronavirus: 48692:>1.0e+6, Haemophilus influenzae: 21217:>1.0e+6, rhinovirus type A: 5590:9.3e+5, EB virus (EBV): 1231:2.7e+5, Fusobacterium nucleatum: 169:2.3e+4,	negative
2024-02-27 11:30:05	Wangxiulan	female	68 years old	0.8	105	sputum	Human respiratory virus type 3 (human parainfluenza virus type 3): 60499:>1.0e+6, human metapneumovirus: 668:2.9e+4, Haemophilus influenzae: 134:6.1e+3, rhinovirus type C: 133:6.9e+3,	Human rhinovirus, adenovirus
2024-02-26 12:02:21	Wangdazhao	male	75 years old	2.08	114	sputum	Novel coronavirus: 43746:>1.0e+6, rhinovirus type A: 13358:>1.0e+6, Rhizopus oryzae: 5902:1.5e+4, Pichia pastoris (Candida krusei): 102:<1.0e+3,	negative
2024-02-22 12:39:09	Zoutong	male	66 years old	2.07	122	sputum	Haemophilus influenzae: 44002:>1.0e+6, human respiratory syncytial virus type A: 6059:2.6e+5, herpes simplex virus type 1 (HSV-1): 26:<1.0e+3,	Respiratory syncytial virus, Haemophilus influenzae
2024-03-11 11:36:41	Qin, Han and Jin Dynasties	male	64 years old	1.23	138	sputum	Novel coronavirus (omicron_xbb.1): 47138:>1.0e+6, Pichia pastoris (Candida krusei): 2608:8.7e+3, Candida glabrata: 804:4.0e+3, influenza B virus: 683:1.5e+5, cytomegalovirus (CMV): 320:3.9e+4, EB virus (EBV): 172:3.6e+4, Stenotrophomonas maltophilia: 134:1.3e+4, human respiratory syncytial virus type B: 109:6.9e+4, simple herpesvirus type 1 (HSV-1): 58:<1.0e+3,	Saccharomyces cerevisiae, Stenotrophomonas maltophilia, influenza B virus, respiratory syncytial virus
2024-01-29 12:02:12	Guosuying	female	74 years old	2.74	149	sputum	Human respiratory syncytial virus type B: 30332:>1.0e+6, Aspergillus fumigatus: 4847:3.6e+3, Aspergillus flavus complex group: 4608:3.2e+4,	Aspergillus flavus
2024-02-23 11:34:07	Liguangsong	female	72 years old	0.71	153	sputum	Candida albicans: 40054:>1.0e+6, rhinovirus type B: 16688:>1.0e+6, human respiratory syncytial virus type A: 9346:>1.0e+6,	Candida albicans, human rhinovirus, respiratory syncytial virus, adenovirus, Escherichia coli
2024-01-24 11:50:11	Chenshudong	male	45 years old	0	224	sputum	Influenza B virus: 60064:>1.0e+6, EB virus (EBV): 8329:>1.0e+6, human adenovirus type 2: 1172:1.8e+4, Staphylococcus aureus: 784:1.3e+3, methicillin-resistant Staphylococcus resistance gene: meca:103	Candida lusitaniae
2024-01-06 11:28:01	Chenshudong	male	45 years old	0	224	sputum	Fusobacterium nucleatum: 7011:4.5e+4, Haemophilus influenzae: 628:1.0e+4, herpes simplex virus type 1 (HSV-1): 84:2.1e+3,	negative
2024-02-07 11:13:35	Chenshudong	male	45 years old	0	224	sputum	Stenotrophomonas maltophilia: 28759:>1.0e+6, influenza B virus: 16:<1.0e+3,	negative
2024-03-18 11:24:13	Bai Chuanding	male	73 years old	21.95	1083	sputum	Rhinovirus type A: 34752:>1.0e+6, Fusobacterium nucleatum: 2422:2.2e+4, Aspergillus flavus complex: 706:4.6e+3, Haemophilus influenzae: 188:3.9e+3, Pneumocystis yarrowii: 15:<1.0e+3,	negative
2024-05-07 15:52:17	Zhuangyuqin	female	54 years old	0.02	1	sputum	No pathogen found	negative
2024-04-22 11:36:53	Qianlingying	female	68 years old	0.51	1	sputum	Human respiratory virus type 3 (human parainfluenza virus type 3): 43740:>1.0e+6, Fusobacterium nucleatum: 129:4.1e+3, Stenotrophomonas maltophilia: 102:3.0e+3,	negative
2024-04-10 11:39:26	Zhangzhijun	male	72 years old	0.39	10	sputum	Candida albicans: 19095:>1.0e+6, Aspergillus flavus complex: 14072:>1.0e+6, EB virus (EBV): 3505:3.2e+5, Candida glabrata: 2308:6.6e+3, Fusobacterium nucleatum: 1463:5.8e+4, Rhizopus Microspora: 454:1.5e+3, Klebsiella pneumoniae: 198:8.9e+3, Aspergillus niger complex: 167:7.2e+3, Aspergillus terreus complex: 28:<1.0e+3,	negative
2024-03-20 11:54:10	Zhangzhenrong	female	66 years old	0.43	103	sputum	Epstein Barr virus (EBV): 27192:>1.0e+6, Haemophilus influenzae: 308:2.2e+4, Burkholderia cepacia complex: 48:<1.0e+3, micromonomonas minimus: 45:<1.0e+3, Fusobacterium nucleatum: 39:<1.0e+3,	negative
2024-05-20 11:13:11	Chenfurong	female	74 years old	0.02	11	sputum	Haemophilus influenzae: 24752:>1.0e+6, human adenovirus type 6: 593:5.8e+3,	negative
2024-03-13 15:36:56	Mei Xueying	female	75 years old	0.85	131	sputum	New coronavirus: 65542:>1.0e+6, rhinovirus C: 9030:>1.0e+6, Aspergillus flavus complex: 515:2.1e+4, human mumps virus 4 (human parainfluenza virus 4): 215:3.6e+4,	Novel coronavirus, human rhinovirus
2024-04-11 10:59:46	Zhouyouzhi	male	70 years old	0.97	136	sputum	Haemophilus influenzae: 46626:>1.0e+6, Candida albicans: 25763:>1.0e+6, EB virus (EBV): 5092:6.1e+5, influenza A H1N1 (2009): 386:1.1e+4, herpes simplex virus type 1 (HSV-1): 17:<1.0e+3,	negative
2024-05-11 10:53:50	Zhaohongyin	male	67 years old	0.39	154	sputum	Candida albicans: 68439:>1.0e+6,	negative
2024-04-01 11:50:19	Weicuizhen	female	75 years old	5.38	165	sputum	Candida tropicalis: 19984:>1.0e+6, Fusobacterium nucleatum: 1042:7.3e+3, Haemophilus influenzae: 881:7.4e+3, Streptococcus angina group: 352:<1.0e+3,	negative
2024-04-29 16:30:01	Wangrenzhang	male	70 years old	3.15	173	sputum	Epstein Barr virus (EBV): 14178:>1.0e+6, novel coronavirus: 3057:1.6e+4, rhinovirus type A: 2306:1.8e+4, Pneumocystis yarrowii: 653:<1.0e+3, Haemophilus influenzae: 41:<1.0e+3,	negative
2024-04-26 11:15:40	Li Fubao	male	51 years old	5	206	sputum	Aspergillus flavus complex group: 447:1.5e+3, Acinetobacter baumannii: 224:1.7e+3, Streptococcus angina group: 19:<1.0e+3,	negative
2024-04-08 11:57:50	Yangxiaojuan	female	41 years old	3.38	207	sputum	Haemophilus influenzae: 4:<1.0e+3,	negative
2024-05-17 11:58:16	Zhangzhijun	male	72 years old	1.42	21	sputum	Candida albicans: 26137:>1.0e+6, novel coronavirus: 24129:>1.0e+6, Epstein Barr virus (EBV): 12556:>1.0e+6, Candida glabrata: 5270:1.1e+4, Fusobacterium nucleatum: 3593:1.0e+5, Aspergillus flavus complex: 112:4.2e+3,	negative
2024-04-01 11:55:02	Wangxiuying	female	60 years old	4.13	224	sputum	Epstein Barr virus (EBV): 20663:>1.0e+6, herpes simplex virus type 1 (HSV-1): 143:1.3e+3,	negative
2024-05-06 11:31:15	Wei Yong	male	59 years old	2.42	234	sputum	Klebsiella pneumoniae: 52902:>1.0e+6, human coronavirus hku1:3804:>1.0e+6, Epstein Barr virus (EBV): 1119:8.2e+5, carbapenemase gene - class a carbapenemase gene: blakpc:7494	klebsiella pneumoniae
2024-02-02 12:29:02	Wangxiuying	female	60 years old	1.59	253	sputum	Epstein Barr virus (EBV): 3336:4.6e+5, human respiratory syncytial virus type B: 1928:6.9e+5, Klebsiella pneumoniae: 113:1.2e+4, Fusobacterium nucleatum: 53:<1.0e+3, herpes simplex virus type 1 (HSV-1): 50:<1.0e+3,	Respiratory syncytial virus
2024-05-13 12:01:39	Liuchunfu	male	73 years old	2.58	301	sputum	Streptococcus pneumoniae: 490:3.4e+3, Legionella pneumophila: 199:4.7e+3, Fusobacterium nucleatum: 130:3.0e+3, Pneumocystis yersiniae: 102:<1.0e+3, Aspergillus flavus complex: 38:<1.0e+3, Klebsiella mutabilis: 18:<1.0e+3,	negative
2024-05-08 16:07:23	Shiyuxia	female	62 years old	11.76	321	sputum	Neocoronavirus: 63914:>1.0e+6, Candida albicans: 9509:>1.0e+6, human adenovirus type 6: 703:1.7e+5,	negative
2024-05-27 11:05:03	Wangyuzhi	female	71 years old	2.04	40	sputum	Fusobacterium nucleatum: 914:6.0e+3, coronavirus neoformans: 519:2.6e+3,	negative
2024-05-14 11:35:09	Jiangxiangzhi	male	77 years old	0.06	5	sputum	Aspergillus flavus complex group: 16636:>1.0e+6, rhinovirus type C: 12562:>1.0e+6, Candida parapsilosis: 3797:1.1e+4, EBV: 115:2.3e+4,	negative
2024-04-27 11:30:25	Sunchuanlan	female	62 years old	33.97	65	sputum	Aspergillus flavus complex group: 15423:>1.0e+6, rhinovirus type A: 12170:>1.0e+6, human herpesvirus 6A (HHV-6A): 267:2.7e+4, Epstein Barr virus (EBV): 141:3.0e+4, Pneumocystis yarrowii: 55:<1.0e+3,	negative
2024-04-25 12:23:28	Zhang Yuxin	male	75 years old	0.29	67	sputum	Candida albicans: 36615:>1.0e+6, rhinovirus type A: 18470:>1.0e+6, herpes simplex virus type 1 (HSV-1): 3584:4.9e+4, Aspergillus flavus complex: 1271:8.1e+3, Pseudomonas aeruginosa: 100:1.5e+5, Aspergillus niger complex: 96:1.2e+3, cytomegalovirus (CMV): 12:<1.0e+3,	Candida albicans
2024-05-15 10:57:20	Sunchuanlan	female	63 years old	0.03	7	sputum	Rhinovirus type A: 18082:>1.0e+6, Aspergillus flavus complex: 13709:>1.0e+6, human herpesvirus type 6A (HHV-6A): 342:7.4e+3, micromonomonas minimus: 205:<1.0e+3,	negative
2024-03-15 11:31:36	Zhang Yuxin	male	75 years old	1.97	84	sputum	Aureus: 14446:>1.0e+6, Fusobacterium nucleatum: 6627:1.4e+5, Candida albicans: 1706:2.6e+3, Streptococcus angina group: 1384:8.9e+3, methicillin-resistant Staphylococcus resistance gene: meca:1413	negative
2024-04-05 11:16:11	Zhangbowen	male	16 years old	3.67	90	sputum	New coronavirus: 80649:>1.0e+6, Fusobacterium nucleatum: 27:<1.0e+3, herpes simplex virus type 1 (HSV-1): 9:<1.0e+3,	klebsiella pneumoniae
