# Supplementary material for: Enhanced Pathogen Detection in Hematology Patients with Respiratory Infections Using Targeted Next-Generation Sequencing (tNGS)
Source: Research Square preprint supplement (doi:10.21203/rs.3.rs-6951707/v1), 2025-06-25
Supplement: Supplementary file 5 [file 9beafd466f6f6573661a015d.xlsx]

## Sheet: Sheet1
				Table S1
Viruses (79 species)				Bacteria (80 species)				Fungi (32 species)	Others (7 species)	The detection range of drug resistance genes
BK polyomavirus (human polyomavirus type 1)	Human herpesvirus type 6B	Coxsackievirus A10	Influenza C virus	Corynebacterium diphtheria	Micromonas parvum	Acinetobacter baumanni	Neisseria meningitidis	Candida glabrata	Chlamydia pneumoniae	Full name	Abbreviation	Detection of target genes	Notes
Human adenovirus type 1	JC polyoma viruses polyoma virus type 2 (people)	Coxsackievirus A16	Influenza a virus H1N1 (2009).	Asia mycobacteria	Rhodococcus equi	Acinetobacter joni	Kill the Pasteur bacteria	Aspergillus flavus composite group	Chlamydia psittaci	Carbapenem-resistant Enterobacteriaceae	CRE	blaKPC	Class A carbapenemases
Human adenovirus type 2	WU polyomavirus (polyoma virus type 4)	Coxsackievirus type A2	Hepatitis b virus Victoria department	Bird mycobacteria	Staphylococcus aureus,	Acinetobacter ulcin	Singular proteus	Smoke aspergillus	Chlamydia trachomatis			blaSME
Human adenovirus type 21		Coxsackie virus type A5	Influenza B virus Yamagata lineage	Mycobacterium avium complex	No milk streptococcus	Bacteroides fragilis	Pseudomonas aeruginosa	Aspergillus Niger complex	Mycoplasma pneumoniae			blaIMI
Human adenovirus type 5		Coxsackievirus A6	Measles virus	Mycobacterium cryptic	Streptococcus anginosus group	Bordetella holmstrafei	Serratia marcescens	Aspergillus terreus complex	Ureaplasma parvum			blaGES
Human adenovirus type 55		Coxsackievirus type B3	Mumps virus	Mycobacterium gordonii	Streptococcus intermedia	Bordetella paratyphi	Stenotrophomonas maltophilia	Candida albicans	Ureaplasma urealyticum			blaNDM	Group B metallo-β-lactamases
Human adenovirus type 57		Echovirus type E18	Rhinovirus	Mycobacterium intracellulare	Streptococcus pneumoniae	Bordetella pertussis		Candida parapsilosis	Benacox bodies			blaIMP
Human adenovirus type 6		Echovirus type E30	Rhinovirus type A	Mycobacterium kansasii	Streptococcus pyogenes	Brucella SPP.						blaVIM
Human adenovirus type 7		Enterovirus	Rhinoviruses type B	Farmar mycobacteria	Trophomonas Whipple	New onion burkholderia bacteria		Tropical candida				blaSPM
Human adenovirus type 3		Enterovirus group A	Rhinovirus type C	Nontuberculous mycobacteria	Arcanobacterium pyogenes	Burkholderia cepacia		Cryptococcus gattii				blaGIM
Adenovirus type 4		Enterovirus A71 type	Rubella virus	Scrofula mycobacteria		Onion burkholderia bacteria compound group		Cryptococcus neoformans				blaOXA-48	Class D carbapenemases
Human herpes virus type 1 (HSV1)		Enterovirus group B	novel coronavirus	Molisch mycobacteria		Glanders burkholderia bacteria		Fusarium SPP		Methicillin-resistant Staphylococcus aureus	MRSA	mecA	/
Human herpesvirus type 2 (HSV2)		Enterovirus group C		The ape mycobacteria		Melioidosis burkholderia bacteria		Histoplasma capsulatum		Mycoplasma pneumoniae macrolide-resistant 23rRNA	/	A2063G	/
Human herpes virus type 3 (VZV)		Enterovirus group D		Sur plus mycobacteria		Burkholderia contamination		Genus Transversalis				A2064G
Human herpes virus (CMV) type 5		Enterovirus D68		Mycobacterium tuberculosis complex group		Burkholderia bacteria autophagy		Umbrella lie mould				A2067G
Human herpesvirus 6		Human coronavirus 229E		Mycobacterium xenopi		Elizabethkingia anopheles		Transverse Terrier branching				C2617G
Human herpesvirus 7		Human coronavirus HKU1		Mycobacterium abscessus		Meningeal pus poisonous Elizabeth gold bacteria		Candida gijniensis (Pichia gijniensis)
Human bocavirus type 1		Coronavirus NL63		Mycobacterium chelonis-abscessus complex		Enterobacter cloacae complex		Mucor irregular
Boca virus type 2		Coronavirus OC43		Mycobacterium chelonae		E. coli		Mucor racemosa
Human bocavirus type 3		Human metapneumovirus		Mycobacterium fortuitorum		Fusobacterium necrotizing		Pichia Kudriazwy (Candida krusei)
Human bocavirus type 4		Human mumps virus type 2 (human parainfluenza virus type 2)		Shame scale mycobacteria		Fusobacterium nucleatum		Pneumocystis jirovecii
Human herpesvirus 4 (EBV)		Human mumps virus type 4 (human parainfluenza virus type 4)		Nocardia SPP		Haemophilus influenzae		Rhizorhynchus SPP
Human adenovirus		Human respiratory syncytial virus type A		Nocardia abscessus		Klebsiella aerogenes		Tiny hair mildew
Human adenovirus group B		Respiratory syncytial virus B		Nocardia africanus		Produce acid klebsiella bacteria		Rhizopus SPP.
Human adenovirus group C		Human respiratory virus type 1 (deputy influenza virus type 1)		Nocardia asteroides		Klebsiella pneumoniae		Rhizobium deletinii
Human adenovirus group D		Human respiratory virus 3 (human parainfluenza virus 3)		Nocardia brasiliensis		Klebsiella variicola		Rhizobium microsporum
Human parvovirus B19		Influenza A virus		Nocardia sag		Legionella sp.		Rhizopus oryzae
Human adenovirus type 11		Influenza A virus H1N1		Nocardia SAN Giorgio (Nocardia Gelsenkirchen)		Legionella bozeman		Scedosporium sp
Human adenovirus type 14		Influenza A virus H3N2		Nocardia farcinica		Legionella pneumophila		Scedosporium apiosperma
Human adenovirus type 34		H5N1 influenza a virus		New card bacteria		Legionella longbeachaei		Cedospora boydii (Cedospora boydii)
Human adenovirus type 35		Influenza a virus H7N9		Guinea pig ear card bacteria		Mick dade legionella bacteria		Carlyle marney basket bacteria
Human herpesvirus 6 type a		Hepatitis b virus		Nocardia terpene		Moraxella catarrhalis
DNA viruses		RNA viruses		Gram-positive bacteria		Gram-negative bacteria
