# Supplementary material for: Enhanced Pathogen Detection in Hematology Patients with Respiratory Infections Using Targeted Next-Generation Sequencing (tNGS)
Source: Research Square preprint supplement (doi:10.21203/rs.3.rs-6951707/v1), 2025-06-25
Supplement: Supplementary file 6 [file d5c19237a0f82be955c27ba5.xlsx]

## Sheet: Sheet1
Characteristic	Value
Median age, years	58(16,86)
Alive,n(%)	40(74.1)
Death,n(%)	14(25.9)
Male,n(%)	31(57.4)
Female,n(%)	23(42.6)
Agranulocytosis,n(%)	27(36.4)
platelet counts less than 20×109	21(28.3)
platelet counts less than 50×109	28(37.8)
bronchoalveolar lavage,n(%)	4(8)
not bronchoalveolar lavage,n(%)	50(92)
